# Supplementary material for: ORCHIDEE-MICT-BIOENERGY: an attempt to represent the production of lignocellulosic crops for bioenergy in a global vegetation model
Source: Copernicus journal article supplement (doi:10.5194/gmd-2017-313), 2018-02-19
Supplement: Supplementary file 1 [file SI_TableS1to3_171018.xlsx]

## Sheet: Table S1
Reference	Country	Site	Lat	Lon	Types	Species	Method	Time_measured	Vcmax	Vcmax_Unit	T_vcmax	T_average	Jmax	Jmax_Unit	SLA	SLA_Unit	Treatment	Note
Albaugh et al., 2014, AFM	USA	North Carolina	35.2667	-77.4667	Switchgrass	Panicum virgatum L.	field measurement	Jun-Oct, 2010	26	umol/m2/s		25
Mitchell, 2012, Thesis	USA				Switchgrass	Panicum virgatum L.	glasshouse/chamber experiment		15.73	umol/m2/s	14/12	13	30.14	umol/m2/s
Mitchell, 2012, Thesis	USA				Switchgrass	Panicum virgatum L.	glasshouse/chamber experiment		27.56	umol/m2/s	28/25	25	31.61	umol/m2/s
Mitchell, 2012, Thesis	USA				Miscanthus	Miscanthus x giganteus	glasshouse/chamber experiment		13.23	umol/m2/s	14/12	13	29.23	umol/m2/s
Mitchell, 2012, Thesis	USA				Miscanthus	Miscanthus x giganteus	glasshouse/chamber experiment		48.94	umol/m2/s	28/25	25	39.13	umol/m2/s
Yan et al., 2015, GCBB	China	JH, Jiangxia, Hubei			Miscanthus	M. sacchariflorus	field measurement	Jul-Oct, 2011	33.25	umol/m2/s	25	25	103.025	umol/m2/s
Yan et al., 2015, GCBB	China	JH, Jiangxia, Hubei			Miscanthus	M. sinensis	field measurement	Jul-Oct, 2011	36.5	umol/m2/s	25	25	89.125	umol/m2/s
Yan et al., 2015, GCBB	China	JH, Jiangxia, Hubei			Miscanthus	M. lutarioriparius	field measurement	Jul-Oct, 2011	50	umol/m2/s	25	25	141.275	umol/m2/s
Yan et al., 2015, GCBB	China	QG, Qingyang, Gansu			Miscanthus	M. sacchariflorus	field measurement	Jun-Oct, 2011	29	umol/m2/s	17.8	17.8	82.9667	umol/m2/s
Yan et al., 2015, GCBB	China	QG, Qingyang, Gansu			Miscanthus	M. sinensis	field measurement	Jun-Oct, 2011	27	umol/m2/s	17.8	17.8	76.8667	umol/m2/s
Yan et al., 2015, GCBB	China	QG, Qingyang, Gansu			Miscanthus	M. lutarioriparius	field measurement	Jun-Oct, 2011	44.5	umol/m2/s	17.8	17.8	125.9	umol/m2/s
Oparah, 2012, Thesis	New Zealand				Eucalyptus	E. argophloia	glasshouse experiment		86.9	umol/m2/s	36/16	26	191.9	umol/m2/s
Oparah, 2012, Thesis	New Zealand				Eucalyptus	E. argophloia	glasshouse experiment		77.7	umol/m2/s	22/12	17	167.7	umol/m2/s
Oparah, 2012, Thesis	New Zealand				Eucalyptus	E. argophloia	glasshouse experiment		71.9	umol/m2/s	10/5	7.5	159	umol/m2/s
Oparah, 2012, Thesis	New Zealand				Eucalyptus	E. bosistoana	glasshouse experiment		70	umol/m2/s	36/16	26	149	umol/m2/s
Oparah, 2012, Thesis	New Zealand				Eucalyptus	E. bosistoana	glasshouse experiment		58.4	umol/m2/s	22/12	17	130	umol/m2/s
Oparah, 2012, Thesis	New Zealand				Eucalyptus	E. bosistoana	glasshouse experiment		42.7	umol/m2/s	10/5	7.5	91.8	umol/m2/s
Oparah, 2012, Thesis	New Zealand				Eucalyptus	E. fastigata	glasshouse experiment		69.2	umol/m2/s	36/16	26	176	umol/m2/s
Oparah, 2012, Thesis	New Zealand				Eucalyptus	E. fastigata	glasshouse experiment		10.7	umol/m2/s	22/12	17	149.7	umol/m2/s
Oparah, 2012, Thesis	New Zealand				Eucalyptus	E. fastigata	glasshouse experiment		53.6	umol/m2/s	10/5	7.5	115.7	umol/m2/s
Oparah, 2012, Thesis	New Zealand				Eucalyptus	E. globoidea	glasshouse experiment		59	umol/m2/s	36/16	26	147.8	umol/m2/s
Oparah, 2012, Thesis	New Zealand				Eucalyptus	E. globoidea	glasshouse experiment		52.6	umol/m2/s	22/12	17	128.4	umol/m2/s
Oparah, 2012, Thesis	New Zealand				Eucalyptus	E. globoidea	glasshouse experiment		42.5	umol/m2/s	10/5	7.5	98.6	umol/m2/s
Sharwood et al., 2017, JEB	Australia	Albany, Vic	-33.6167	143.617	Eucalyptus	E. globulus	field measurement		81	umol/m2/s	25	25	140	umol/m2/s
Sharwood et al., 2017, JEB	Australia	Albany, Vic	-33.6167	143.617	Eucalyptus	E. globulus	field measurement		115	umol/m2/s	25	25	175	umol/m2/s
Sharwood et al., 2017, JEB	Australia	Albany, Vic	-33.6167	143.617	Eucalyptus	E. globulus	field measurement		72	umol/m2/s	25	25	115	umol/m2/s
Lin et al., 2013, TP; Lin, 2012, Thesis	Australia	Richmond, NSW	-33.6	150.733	Eucalyptus	E. crebra	field measurement	Aug, 2008	87.6	umol/m2/s	25	25	170.2	umol/m2/s
Lin et al., 2013, TP; Lin, 2012, Thesis	Australia	Richmond, NSW	-33.6	150.733	Eucalyptus	E. crebra	field measurement	Nov, 2008	116.9	umol/m2/s	25	25	151.8	umol/m2/s
Lin et al., 2013, TP; Lin, 2012, Thesis	Australia	Richmond, NSW	-33.6	150.733	Eucalyptus	E. crebra	field measurement	Feb, 2009	140	umol/m2/s	25	25	180.6	umol/m2/s
Lin et al., 2013, TP; Lin, 2012, Thesis	Australia	Richmond, NSW	-33.6	150.733	Eucalyptus	E. tereticornis	field measurement	Aug, 2008	87.5	umol/m2/s	25	25		umol/m2/s
Lin et al., 2013, TP; Lin, 2012, Thesis	Australia	Richmond, NSW	-33.6	150.733	Eucalyptus	E. tereticornis	field measurement	Nov, 2008	128.6	umol/m2/s	25	25		umol/m2/s
Lin et al., 2013, TP; Lin, 2012, Thesis	Australia	Richmond, NSW	-33.6	150.733	Eucalyptus	E. tereticornis	field measurement	Feb, 2009	116.4	umol/m2/s	25	25		umol/m2/s
Lin et al., 2013, TP; Lin, 2012, Thesis	Australia	Richmond, NSW	-33.6	150.733	Eucalyptus	E. saligna	field measurement	Aug, 2008	74	umol/m2/s	25	25	142.7	umol/m2/s
Lin et al., 2013, TP; Lin, 2012, Thesis	Australia	Richmond, NSW	-33.6	150.733	Eucalyptus	E. saligna	field measurement	Nov, 2008	100.3	umol/m2/s	25	25	147.2	umol/m2/s
Lin et al., 2013, TP; Lin, 2012, Thesis	Australia	Richmond, NSW	-33.6	150.733	Eucalyptus	E. saligna	field measurement	Feb, 2009	106.3	umol/m2/s	25	25	128.7	umol/m2/s
Lin et al., 2013, TP; Lin, 2012, Thesis	Australia	Richmond, NSW	-33.6	150.733	Eucalyptus	E. melliodora	field measurement	Aug, 2008	107.7	umol/m2/s	25	25	201	umol/m2/s
Lin et al., 2013, TP; Lin, 2012, Thesis	Australia	Richmond, NSW	-33.6	150.733	Eucalyptus	E. melliodora	field measurement	Nov, 2008	147.6	umol/m2/s	25	25	173.4	umol/m2/s
Lin et al., 2013, TP; Lin, 2012, Thesis	Australia	Richmond, NSW	-33.6	150.733	Eucalyptus	E. melliodora	field measurement	Feb, 2009	167.1	umol/m2/s	25	25	219.7	umol/m2/s
Lin et al., 2013, TP; Lin, 2012, Thesis	Australia	Richmond, NSW	-33.6	150.733	Eucalyptus	E. cladocalyx	field measurement	Aug, 2008	59.9	umol/m2/s	25	25	139.7	umol/m2/s
Lin et al., 2013, TP; Lin, 2012, Thesis	Australia	Richmond, NSW	-33.6	150.733	Eucalyptus	E. cladocalyx	field measurement	Nov, 2008	126	umol/m2/s	25	25	168.9	umol/m2/s
Lin et al., 2013, TP; Lin, 2012, Thesis	Australia	Richmond, NSW	-33.6	150.733	Eucalyptus	E. cladocalyx	field measurement	Feb, 2009	123.8	umol/m2/s	25	25	176.9	umol/m2/s
Lin et al., 2013, TP; Lin, 2012, Thesis	Australia	Richmond, NSW	-33.6	150.733	Eucalyptus	E. dunnii	field measurement	Aug, 2008	53.1	umol/m2/s	25	25	100	umol/m2/s
Lin et al., 2013, TP; Lin, 2012, Thesis	Australia	Richmond, NSW	-33.6	150.733	Eucalyptus	E. dunnii	field measurement	Nov, 2008	75.1	umol/m2/s	25	25	112.7	umol/m2/s
Lin et al., 2013, TP; Lin, 2012, Thesis	Australia	Richmond, NSW	-33.6	150.733	Eucalyptus	E. dunnii	field measurement	Feb, 2009	67.5	umol/m2/s	25	25	83.9	umol/m2/s
Grassi et al., 2002, PCE	Australia				Eucalyptus	E. grandis	glasshouse experiment		78.8	umol/m2/s	20.45	20.45	114.1	umol/m2/s			N1, nutrient addition level
Grassi et al., 2002, PCE	Australia				Eucalyptus	E. grandis	glasshouse experiment		72.4	umol/m2/s	20.45	20.45	113.5	umol/m2/s			N3, nutrient addition level
Grassi et al., 2002, PCE	Australia				Eucalyptus	E. grandis	glasshouse experiment		64	umol/m2/s	20.45	20.45	93.5	umol/m2/s			N4, nutrient addition level
Grassi et al., 2002, PCE	Australia				Eucalyptus	E. grandis	glasshouse experiment		49.3	umol/m2/s	20.45	20.45	80.9	umol/m2/s			N5, nutrient addition level
Wang et al., 2008, JEB	USA				Miscanthus	Miscanthus x giganteus	glasshouse experiment		17.9	umol/m2/s	25	25
Wang et al., 2008, JEB	USA				Miscanthus	Miscanthus x giganteus	glasshouse experiment		17.2	umol/m2/s	14	14
Dowell et al., 2009	USA	New Franklin, MO	39.0167	-92.7667	Poplar	Populus. deltoides x P. nigra, I45/51	glasshouse/chamber experiment		44.78	umol/m2/s	25/20	25	82.4	umol/m2/s	0.01711	m2 g-1
Dowell et al., 2009	USA	New Franklin, MO	39.0167	-92.7667	Poplar	Populus. deltoides x P. nigra, Eugeneii	glasshouse/chamber experiment		44.53	umol/m2/s	25/20	25	82.84	umol/m2/s	0.01667	m2 g-1
Dowell et al., 2009	USA	New Franklin, MO	39.0167	-92.7667	Poplar	Populus. deltoides, 26C6R51	glasshouse/chamber experiment		56.04	umol/m2/s	25/20	25	107.93	umol/m2/s	0.01561	m2 g-1
Dowell et al., 2009	USA	New Franklin, MO	39.0167	-92.7667	Poplar	Populus. deltoides, 22059	glasshouse/chamber experiment		62.56	umol/m2/s	25/20	25	118.07	umol/m2/s	0.01818	m2 g-1
Dowell et al., 2009	USA	New Franklin, MO	39.0167	-92.7667	Poplar	Populus. deltoides, 1112	glasshouse/chamber experiment		52.65	umol/m2/s	25/20	25	96.87	umol/m2/s	0.01685	m2 g-1
Kirschbaum and Tompkins, 1990, AJPP; Wullschleger, 1993, JEB					Eucalyptus	E. grandis			87	umol/m2/s	25	25	185	umol/m2/s
Kirschbaum, 1987, Planta; Wullschleger, 1993, JEB	Australia				Eucalyptus	E. pauciflora	glasshouse experiment		94	umol/m2/s	26	26	170	umol/m2/s
Kirschbaum, 1988, PCE; Wullschleger, 1993, JEB	Australia				Eucalyptus	E. pauciflora	glasshouse experiment		79	umol/m2/s	25	25	167	umol/m2/s
Kirschbaum and Farquhar, 1984, AJPP; Wullschleger, 1993, JEB					Eucalyptus	E. pauciflora			70	umol/m2/s	25	25	147	umol/m2/s
Kuppers, 1987, PCE; Wullschleger, 1993, JEB	Australia	Brindabella Ranges, Canberra			Eucalyptus	E. pauciflora	field measurement		126	umol/m2/s	25	25	222	umol/m2/s
Regehr et al., 1975, Photosynthetica; Wullschleger, 1993, JEB					Poplar	Populus deltoides			59	umol/m2/s	30	30	117	umol/m2/s
JEB; Gaudillere and Mousseau, 1989, OP; Wullschleger, 1993, JEB					Poplar	Populus euramericana			43	umol/m2/s	25	25	90	umol/m2/s
Sage and Sharkey, 1987, PP; Wullschleger, 1993, JEB	USA	Desert Research Institute, Reno, Nevada			Poplar	Populus fremontii	field measurement	May-Sep, 1986	111	umol/m2/s	20	20	237	umol/m2/s
Jurik et al., 1984, PP; Wullschleger, 1993, JEB	USA	Pellston, MI	44.55	-84.7	Poplar	Populus grandidentata	field measurement		72	umol/m2/s	25	25	169	umol/m2/s
Sharkey et al., 1991, PCE; Wullschleger, 1993, JEB	USA	University of Wisconsin Biotron			Poplar	Populus tremuloides	glasshouse/chamber experiment	Jun, 1990	24	umol/m2/s	30	30	68	umol/m2/s
Ogren and Oquist, 1985, Planta; Wullschleger, 1993, JEB	Sweden				Willow	Salix sp.	chamber experiment		65	umol/m2/s	25	25	146	umol/m2/s
Wang et al., 2012, GCBB	USA	Urbana	40.04	-88.24	Miscanthus	Miscanthus x giganteus	field measurement	2009 Oct 5	30.4	umol/m2/s		25			0.0151	m2 g-1	Nfert	yield
Wang et al., 2012, GCBB	USA	Urbana	40.04	-88.24	Miscanthus	Miscanthus x giganteus	field measurement	2009 Sep 17	21.9	umol/m2/s		25			0.0195	m2 g-1	Nfert	yield
Wang et al., 2012, GCBB	USA	Urbana	40.04	-88.24	Miscanthus	Miscanthus x giganteus	field measurement	2009 Aug 27	22	umol/m2/s		25			0.0154	m2 g-1	Nfert	yield
Wang et al., 2012, GCBB	USA	Urbana	40.04	-88.24	Miscanthus	Miscanthus x giganteus	field measurement	2009 Jul 23	31.5	umol/m2/s		25			0.0121	m2 g-1	Nfert	yield
Wang et al., 2012, GCBB	USA	Urbana	40.04	-88.24	Miscanthus	Miscanthus x giganteus	field measurement	2009 Jun 15	40.4	umol/m2/s		25			0.0129	m2 g-1	Nfert	yield
Wang et al., 2012, GCBB	USA	Urbana	40.04	-88.24	Miscanthus	Miscanthus x giganteus	field measurement	2009 Oct 5	31.5	umol/m2/s		25			0.014	m2 g-1	Control	yield
Wang et al., 2012, GCBB	USA	Urbana	40.04	-88.24	Miscanthus	Miscanthus x giganteus	field measurement	2009 Sep 17	23.5	umol/m2/s		25			0.017	m2 g-1	Control	yield
Wang et al., 2012, GCBB	USA	Urbana	40.04	-88.24	Miscanthus	Miscanthus x giganteus	field measurement	2009 Aug 27	27.6	umol/m2/s		25			0.0165	m2 g-1	Control	yield
Wang et al., 2012, GCBB	USA	Urbana	40.04	-88.24	Miscanthus	Miscanthus x giganteus	field measurement	2009 Jul 23	27.8	umol/m2/s		25			0.0113	m2 g-1	Control	yield
Wang et al., 2012, GCBB	USA	Urbana	40.04	-88.24	Miscanthus	Miscanthus x giganteus	field measurement	2009 Jun 15	33	umol/m2/s		25			0.015	m2 g-1	Control	yield
Wang et al., 2012, GCBB	USA	Urbana	40.04	-88.24	Miscanthus	Miscanthus x giganteus	field measurement	2009 Oct 5	18.6	umol/m2/s		25			0.0131	m2 g-1	Nfert	yield
Wang et al., 2012, GCBB	USA	Urbana	40.04	-88.24	Miscanthus	Miscanthus x giganteus	field measurement	2009 Sep 17	22.8	umol/m2/s		25			0.0173	m2 g-1	Nfert	yield
Wang et al., 2012, GCBB	USA	Urbana	40.04	-88.24	Miscanthus	Miscanthus x giganteus	field measurement	2009 Aug 27	15.8	umol/m2/s		25			0.0162	m2 g-1	Nfert	yield
Wang et al., 2012, GCBB	USA	Urbana	40.04	-88.24	Miscanthus	Miscanthus x giganteus	field measurement	2009 Jul 23	9.69	umol/m2/s		25			0.0121	m2 g-1	Nfert	yield
Wang et al., 2012, GCBB	USA	Urbana	40.04	-88.24	Miscanthus	Miscanthus x giganteus	field measurement	2009 Oct 5	17.1	umol/m2/s		25			0.0125	m2 g-1	Control	yield
Wang et al., 2012, GCBB	USA	Urbana	40.04	-88.24	Miscanthus	Miscanthus x giganteus	field measurement	2009 Sep 17	15.9	umol/m2/s		25			0.0153	m2 g-1	Control	yield
Wang et al., 2012, GCBB	USA	Urbana	40.04	-88.24	Miscanthus	Miscanthus x giganteus	field measurement	2009 Aug 27	21.3	umol/m2/s		25			0.0145	m2 g-1	Control	yield
Wang et al., 2012, GCBB	USA	Urbana	40.04	-88.24	Miscanthus	Miscanthus x giganteus	field measurement	2009 Jul 23	16	umol/m2/s		25			0.0123	m2 g-1	Control	yield
Wang et al., 2012, GCBB	USA	Urbana	40.04	-88.24	Miscanthus	Miscanthus x giganteus	field measurement	2009 Oct 5	20.3	umol/m2/s		25			0.0131	m2 g-1	Nfert	yield
Wang et al., 2012, GCBB	USA	Urbana	40.04	-88.24	Miscanthus	Miscanthus x giganteus	field measurement	2009 Sep 17	12.2	umol/m2/s		25			0.0185	m2 g-1	Nfert	yield
Wang et al., 2012, GCBB	USA	Urbana	40.04	-88.24	Miscanthus	Miscanthus x giganteus	field measurement	2009 Aug 27	13	umol/m2/s		25			0.0164	m2 g-1	Nfert	yield
Wang et al., 2012, GCBB	USA	Urbana	40.04	-88.24	Miscanthus	Miscanthus x giganteus	field measurement	2009 Jul 23	18.9	umol/m2/s		25			0.0141	m2 g-1	Nfert	yield
Wang et al., 2012, GCBB	USA	Urbana	40.04	-88.24	Miscanthus	Miscanthus x giganteus	field measurement	2009 Jun 15	21.3	umol/m2/s		25			0.0163	m2 g-1	Nfert	yield
Wang et al., 2012, GCBB	USA	Urbana	40.04	-88.24	Miscanthus	Miscanthus x giganteus	field measurement	2009 Oct 5	23.2	umol/m2/s		25			0.0126	m2 g-1	Control	yield
Wang et al., 2012, GCBB	USA	Urbana	40.04	-88.24	Miscanthus	Miscanthus x giganteus	field measurement	2009 Aug 27	10.4	umol/m2/s		25			0.0152	m2 g-1	Control	yield
Wang et al., 2012, GCBB	USA	Urbana	40.04	-88.24	Miscanthus	Miscanthus x giganteus	field measurement	2009 Jul 23	11.5	umol/m2/s		25			0.0132	m2 g-1	Control	yield
Wang et al., 2012, GCBB	USA	Urbana	40.04	-88.24	Miscanthus	Miscanthus x giganteus	field measurement	2009 Jun 15	19.7	umol/m2/s		25			0.0143	m2 g-1	Control	yield
Wang et al., 2012, GCBB	USA	Urbana	40.04	-88.24	Miscanthus	Miscanthus x giganteus	field measurement	2009 Sep 17	12.4	umol/m2/s		25					Control	yield
Wang et al., 2010, GCBB	USA	Urbana	40.04	-88.24	Switchgrass	Panicum virgatum	field measurement	2009 Sep 17	8.83	umol/m2/s		25			0.0139	m2 g-1	Nfert
Wang et al., 2010, GCBB	USA	Urbana	40.04	-88.24	Switchgrass	Panicum virgatum	field measurement	2009 Aug 27	23.9	umol/m2/s		25			0.0126	m2 g-1	Nfert
Wang et al., 2010, GCBB	USA	Urbana	40.04	-88.24	Switchgrass	Panicum virgatum	field measurement	2009 Jul 23	20.4	umol/m2/s		25			0.0128	m2 g-1	Nfert
Wang et al., 2010, GCBB	USA	Urbana	40.04	-88.24	Switchgrass	Panicum virgatum	field measurement	2009 Jun 15	29.4	umol/m2/s		25			0.0146	m2 g-1	Nfert
Wang et al., 2010, GCBB	USA	Urbana	40.04	-88.24	Switchgrass	Panicum virgatum	field measurement	2009 Sep 17	12.5	umol/m2/s		25			0.0142	m2 g-1	Control
Wang et al., 2010, GCBB	USA	Urbana	40.04	-88.24	Switchgrass	Panicum virgatum	field measurement	2009 Aug 27	12.6	umol/m2/s		25			0.0126	m2 g-1	Control
Wang et al., 2010, GCBB	USA	Urbana	40.04	-88.24	Switchgrass	Panicum virgatum	field measurement	2009 Jul 23	23.1	umol/m2/s		25			0.0152	m2 g-1	Control
Wang et al., 2010, GCBB	USA	Urbana	40.04	-88.24	Switchgrass	Panicum virgatum	field measurement	2009 Jun 15	25.6	umol/m2/s		25			0.0132	m2 g-1	Control
Wang et al., 2010, GCBB	USA	Urbana	40.04	-88.24	Switchgrass	Panicum virgatum	field measurement	2009 Sep 17	12	umol/m2/s		25			0.0143	m2 g-1	Nfert
Wang et al., 2010, GCBB	USA	Urbana	40.04	-88.24	Switchgrass	Panicum virgatum	field measurement	2009 Aug 27	12	umol/m2/s		25			0.0141	m2 g-1	Nfert
Wang et al., 2010, GCBB	USA	Urbana	40.04	-88.24	Switchgrass	Panicum virgatum	field measurement	2009 Jul 23	11.4	umol/m2/s		25			0.0127	m2 g-1	Nfert
Wang et al., 2010, GCBB	USA	Urbana	40.04	-88.24	Switchgrass	Panicum virgatum	field measurement	2009 Sep 17	10.7	umol/m2/s		25			0.0161	m2 g-1	Control
Wang et al., 2010, GCBB	USA	Urbana	40.04	-88.24	Switchgrass	Panicum virgatum	field measurement	2009 Aug 27	13.4	umol/m2/s		25			0.0132	m2 g-1	Control
Wang et al., 2010, GCBB	USA	Urbana	40.04	-88.24	Switchgrass	Panicum virgatum	field measurement	2009 Jul 23	10.5	umol/m2/s		25			0.0142	m2 g-1	Control
Bernacchi et al., 2003	Italy	Tuscania	42.62	11.85	Poplar	Populus alba	field measurement	2002 Jun 1 (Europe/Rome)	60.7	umol/m2/s	25	25	140	umol/m2/s			elevated co2
Bernacchi et al., 2003	Italy	Tuscania	42.62	11.85	Poplar	Populus alba	field measurement	2002 Jun 1 (Europe/Rome)	66.7	umol/m2/s	25	25	130	umol/m2/s			control
Bernacchi et al., 2003	Italy	Tuscania	42.62	11.85	Poplar	Populus nigra	field measurement	2002 Jun 1 (Europe/Rome)	49	umol/m2/s	25	25	140	umol/m2/s			elevated co2
Bernacchi et al., 2003	Italy	Tuscania	42.62	11.85	Poplar	Populus nigra	field measurement	2002 Jun 1 (Europe/Rome)	67	umol/m2/s	25	25	110	umol/m2/s			control
Bernacchi et al., 2003	Italy	Tuscania	42.62	11.85	Poplar	Populus x euramericana	field measurement	2002 Jun 1 (Europe/Rome)	60	umol/m2/s	25	25	145	umol/m2/s			elevated co2
Bernacchi et al., 2003	Italy	Tuscania	42.62	11.85	Poplar	Populus x euramericana	field measurement	2002 Jun 1 (Europe/Rome)	74	umol/m2/s	25	25	125	umol/m2/s			control
Guo and Trotter, 20014, FPB	New Zealand	Palmerston North	-40.35	175.62	Poplar	P. deltoides x P. nigra	chamber room		46	umol/m2/s	22/15	18.5	128	umol/m2/s	0.0149254	m2 g-1	observational
Merilo et al., 2006, EJFR	Estonia	Saare	58.5	22.6	Willow	Salix dasyclados Wimm. clone 81090	field measurement	Sep, 2000	48.98	umol/m2/s	10.7	10.7			0.0123	m2 g-1	Control Sun	yield
Merilo et al., 2006, EJFR	Estonia	Saare	58.5	22.6	Willow	Salix dasyclados Wimm. clone 81090	field measurement	Sep, 2000	37.81	umol/m2/s	10.7	10.7			0.0123	m2 g-1	Control Shade	yield
Merilo et al., 2006, EJFR	Estonia	Saare	58.5	22.6	Willow	Salix dasyclados Wimm. clone 81090	field measurement	Sep, 2000	51.25	umol/m2/s	10.7	10.7			0.0155	m2 g-1	Fertilized Sun	yield
Merilo et al., 2006, EJFR	Estonia	Saare	58.5	22.6	Willow	Salix dasyclados Wimm. clone 81090	field measurement	Sep, 2000	23.89	umol/m2/s	10.7	10.7			0.0203	m2 g-1	Fertilized shade	yield
Merilo et al., 2006, EJFR	Estonia	Saare	58.5	22.6	Willow	Salix viminalis L. clone 78183	field measurement	Sep, 2000	61.11	umol/m2/s	10.7	10.7			0.0129	m2 g-1	Control Sun	yield
Merilo et al., 2006, EJFR	Estonia	Saare	58.5	22.6	Willow	Salix viminalis L. clone 78183	field measurement	Sep, 2000	39.98	umol/m2/s	10.7	10.7			0.0167	m2 g-1	Control Shade	yield
Merilo et al., 2006, EJFR	Estonia	Saare	58.5	22.6	Willow	Salix viminalis L. clone 78183	field measurement	Sep, 2000	61.29	umol/m2/s	10.7	10.7			0.0144	m2 g-1	Fertilized Sun	yield
Merilo et al., 2006, EJFR	Estonia	Saare	58.5	22.6	Willow	Salix viminalis L. clone 78183	field measurement	Sep, 2000	19.99	umol/m2/s	10.7	10.7			0.0214	m2 g-1	Fertilized shade	yield
Merilo et al., 2006, EJFR	Estonia	Saare	58.5	22.6	Willow	Salix viminalis L. clone 78021	field measurement	Sep, 2000	56.68	umol/m2/s	10.7	10.7			0.0114	m2 g-1	Control Sun	yield
Merilo et al., 2006, EJFR	Estonia	Saare	58.5	22.6	Willow	Salix viminalis L. clone 78021	field measurement	Sep, 2000	37.35	umol/m2/s	10.7	10.7			0.0138	m2 g-1	Control Shade	yield
Merilo et al., 2006, EJFR	Estonia	Saare	58.5	22.6	Willow	Salix viminalis L. clone 78021	field measurement	Sep, 2000	56	umol/m2/s	10.7	10.7			0.0121	m2 g-1	Fertilized Sun	yield
Merilo et al., 2006, EJFR	Estonia	Saare	58.5	22.6	Willow	Salix viminalis L. clone 78021	field measurement	Sep, 2000	34.3	umol/m2/s	10.7	10.7			0.0163	m2 g-1	Fertilized shade	yield
Byrd and May II, 2000, CS	USA	Houston, TX			Switchgrass	Panicum virgatum Greenville	greenhouse experiment	Week of Jul 22, 1998							0.0253	m2 g-1	10.0 mM N
Byrd and May II, 2000, CS	USA	Houston, TX			Switchgrass	Panicum virgatum Greenville	greenhouse experiment	Week of Jul 22, 1998							0.0279	m2 g-1	1.0 mM N
Byrd and May II, 2000, CS	USA	Houston, TX			Switchgrass	Panicum virgatum Greenville	greenhouse experiment	Week of Jul 22, 1998							0.026	m2 g-1	0.3 mM N
Byrd and May II, 2000, CS	USA	Houston, TX			Switchgrass	Panicum virgatum Alamo	greenhouse experiment	Week of Jul 22, 1998							0.0223	m2 g-1	10.0 mM N
Byrd and May II, 2000, CS	USA	Houston, TX			Switchgrass	Panicum virgatum Alamo	greenhouse experiment	Week of Jul 22, 1998							0.0256	m2 g-1	1.0 mM N
Byrd and May II, 2000, CS	USA	Houston, TX			Switchgrass	Panicum virgatum Alamo	greenhouse experiment	Week of Jul 23, 1998							0.0248	m2 g-1	0.3 mM N
Byrd and May II, 2000, CS	USA	Houston, TX			Switchgrass	Panicum virgatum Greenville	greenhouse experiment	Week of Aug 23, 1997							0.0243	m2 g-1	dry
Byrd and May II, 2000, CS	USA	Houston, TX			Switchgrass	Panicum virgatum Alamo	greenhouse experiment	Week of Jun 30, 1997							0.0238	m2 g-1	watered
Byrd and May II, 2000, CS	USA	Houston, TX			Switchgrass	Panicum virgatum Alamo	greenhouse experiment	Week of Jun 30, 1997							0.019	m2 g-1	dry
Byrd and May II, 2000, CS	USA	Houston, TX			Switchgrass	Panicum virgatum Alamo	greenhouse experiment	Week of Jun 30, 1997							0.0196	m2 g-1	watered
Byrd and May II, 2000, CS	USA	Houston, TX			Switchgrass	Panicum virgatum Shelter	greenhouse experiment	Season: SON 1995							0.0247	m2 g-1	dry
Byrd and May II, 2000, CS	USA	Houston, TX			Switchgrass	Panicum virgatum Pathfinder	greenhouse experiment	Season: SON 1995							0.0236	m2 g-1	watered
Byrd and May II, 2000, CS	USA	Houston, TX			Switchgrass	Panicum virgatum Pathfinder	greenhouse experiment	Season: SON 1995							0.0249	m2 g-1	dry
Byrd and May II, 2000, CS	USA	Houston, TX			Switchgrass	Panicum virgatum Kanlow	greenhouse experiment	Season: SON 1995							0.023	m2 g-1	dry
Byrd and May II, 2000, CS	USA	Houston, TX			Switchgrass	Panicum virgatum Greenville	greenhouse experiment	Season: SON 1995							0.0266	m2 g-1	dry
Byrd and May II, 2000, CS	USA	Houston, TX			Switchgrass	Panicum virgatum Forestburg	greenhouse experiment	Season: SON 1995							0.0249	m2 g-1	dry
Byrd and May II, 2000, CS	USA	Houston, TX			Switchgrass	Panicum virgatum Cave-In-Rock	greenhouse experiment	Season: SON 1995							0.0251	m2 g-1	watered
Byrd and May II, 2000, CS	USA	Houston, TX			Switchgrass	Panicum virgatum Cave-In-Rock	greenhouse experiment	Season: SON 1995							0.024	m2 g-1	dry
Byrd and May II, 2000, CS	USA	Houston, TX			Switchgrass	Panicum virgatum Cathage	greenhouse experiment	Season: SON 1995							0.0242	m2 g-1	dry
Byrd and May II, 2000, CS	USA	Houston, TX			Switchgrass	Panicum virgatum Blackwell	greenhouse experiment	Season: SON 1995							0.0225	m2 g-1	dry
Byrd and May II, 2000, CS	USA	Houston, TX			Switchgrass	Panicum virgatum Alamo	greenhouse experiment	Season: SON 1995							0.0233	m2 g-1	dry
Trocsanyi et al., 2009, BB	USA	Blackburg, VA	37.1833	-80.4167	Switchgrass	Panicum virgatum Pathfinder	field measurement	1989 Jun 20							0.0185	m2 g-1	observational
Trocsanyi et al., 2009, BB	USA	Blackburg, VA	37.1833	-80.4167	Switchgrass	Panicum virgatum Pathfinder	field measurement	1989 Jun 20							0.0172	m2 g-1	observational
Trocsanyi et al., 2009, BB	USA	Blackburg, VA	37.1833	-80.4167	Switchgrass	Panicum virgatum Pathfinder	field measurement	1989 Jun 20							0.0192	m2 g-1	observational
Trocsanyi et al., 2009, BB	USA	Blackburg, VA	37.1833	-80.4167	Switchgrass	Panicum virgatum Pathfinder	field measurement	1989 Jun 20							0.0192	m2 g-1	observational
Trocsanyi et al., 2009, BB	USA	Blackburg, VA	37.1833	-80.4167	Switchgrass	Panicum virgatum Pathfinder	field measurement	1989 Jun 20							0.0227	m2 g-1	observational
Trocsanyi et al., 2009, BB	USA	Blackburg, VA	37.1833	-80.4167	Switchgrass	Panicum virgatum Pathfinder	field measurement	1989 Jun 9							0.0182	m2 g-1	observational
Trocsanyi et al., 2009, BB	USA	Blackburg, VA	37.1833	-80.4167	Switchgrass	Panicum virgatum Pathfinder	field measurement	1989 Jun 9							0.02	m2 g-1	observational
Trocsanyi et al., 2009, BB	USA	Blackburg, VA	37.1833	-80.4167	Switchgrass	Panicum virgatum Pathfinder	field measurement	1989 Jun 9							0.0217	m2 g-1	observational
Trocsanyi et al., 2009, BB	USA	Blackburg, VA	37.1833	-80.4167	Switchgrass	Panicum virgatum Pathfinder	field measurement	1989 Jun 9							0.0196	m2 g-1	observational
Trocsanyi et al., 2009, BB	USA	Blackburg, VA	37.1833	-80.4167	Switchgrass	Panicum virgatum Pathfinder	field measurement	1989 May 31							0.0217	m2 g-1	observational
Trocsanyi et al., 2009, BB	USA	Blackburg, VA	37.1833	-80.4167	Switchgrass	Panicum virgatum Pathfinder	field measurement	1989 May 31							0.0213	m2 g-1	observational
Trocsanyi et al., 2009, BB	USA	Blackburg, VA	37.1833	-80.4167	Switchgrass	Panicum virgatum Pathfinder	field measurement	1989 May 31							0.0233	m2 g-1	observational
Weih and Ronnberg-Wastljung, 2007	Sweden	Ultuna, Uppsala	59.8167	17.6667	Willow	Salix	field trial	2006							0.01	m2 g-1	Observational
Weih and Ronnberg-Wastljung, 2007	Sweden	Ultuna, Uppsala	59.8167	17.6667	Willow	Salix	field trial	2006							0.0108	m2 g-1	Observational
Weih and Ronnberg-Wastljung, 2007	Sweden	Ultuna, Uppsala	59.8167	17.6667	Willow	Salix	field trial	2006							0.0108	m2 g-1	Observational
Weih and Ronnberg-Wastljung, 2007	Sweden	Ultuna, Uppsala	59.8167	17.6667	Willow	Salix	field trial	2006							0.0117	m2 g-1	Observational
Weih and Ronnberg-Wastljung, 2007	Sweden	Ultuna, Uppsala	59.8167	17.6667	Willow	Salix	field trial	2006							0.0118	m2 g-1	Observational
Weih and Ronnberg-Wastljung, 2007	Sweden	Ultuna, Uppsala	59.8167	17.6667	Willow	Salix	field trial	2006							0.0116	m2 g-1	Observational
Weih and Ronnberg-Wastljung, 2007	Sweden	Ultuna, Uppsala	59.8167	17.6667	Willow	Salix	field trial	2006							0.0111	m2 g-1	Observational
Weih and Ronnberg-Wastljung, 2007	Sweden	Ultuna, Uppsala	59.8167	17.6667	Willow	Salix	field trial	2006							0.0108	m2 g-1	Observational
Weih and Ronnberg-Wastljung, 2007	Sweden	Ultuna, Uppsala	59.8167	17.6667	Willow	Salix	field trial	2006							0.0101	m2 g-1	Observational
Weih and Ronnberg-Wastljung, 2007	Sweden	Ultuna, Uppsala	59.8167	17.6667	Willow	Salix	field trial	2006							0.0104	m2 g-1	Observational
Weih and Ronnberg-Wastljung, 2007	Sweden	Ultuna, Uppsala	59.8167	17.6667	Willow	Salix	field trial	2006							0.0108	m2 g-1	Observational
Weih and Ronnberg-Wastljung, 2007	Sweden	Ultuna, Uppsala	59.8167	17.6667	Willow	Salix	field trial	2006							0.0108	m2 g-1	Observational
Weih and Ronnberg-Wastljung, 2007	Sweden	Ultuna, Uppsala	59.8167	17.6667	Willow	Salix	field trial	2006							0.0106	m2 g-1	Observational
Weih and Ronnberg-Wastljung, 2007	Sweden	Ultuna, Uppsala	59.8167	17.6667	Willow	Salix	field trial	2006							0.0102	m2 g-1	Observational
Weih and Ronnberg-Wastljung, 2007	Sweden	Ultuna, Uppsala	59.8167	17.6667	Willow	Salix	field trial	2006							0.0106	m2 g-1	Observational
Weih and Ronnberg-Wastljung, 2007	Sweden	Ultuna, Uppsala	59.8167	17.6667	Willow	Salix	field trial	2006							0.0115	m2 g-1	Observational
Weih and Ronnberg-Wastljung, 2007	Sweden	Ultuna, Uppsala	59.8167	17.6667	Willow	Salix	field trial	2006							0.0124	m2 g-1	Observational
Weih and Ronnberg-Wastljung, 2007	Sweden	Ultuna, Uppsala	59.8167	17.6667	Willow	Salix	field trial	2006							0.0124	m2 g-1	Observational
Weih and Ronnberg-Wastljung, 2007	Sweden	Ultuna, Uppsala	59.8167	17.6667	Willow	Salix	field trial	2006							0.0133	m2 g-1	Observational
Weih and Ronnberg-Wastljung, 2007	Sweden	Ultuna, Uppsala	59.8167	17.6667	Willow	Salix	field trial	2006							0.0147	m2 g-1	Observational
Weih and Ronnberg-Wastljung, 2007	Sweden	Ultuna, Uppsala	59.8167	17.6667	Willow	Salix	field trial	2006							0.0135	m2 g-1	Observational
Weih and Ronnberg-Wastljung, 2007	Sweden	Ultuna, Uppsala	59.8167	17.6667	Willow	Salix	field trial	2006							0.0132	m2 g-1	Observational
Weih and Ronnberg-Wastljung, 2007	Sweden	Ultuna, Uppsala	59.8167	17.6667	Willow	Salix	field trial	2006							0.0131	m2 g-1	Observational
Weih and Ronnberg-Wastljung, 2007	Sweden	Ultuna, Uppsala	59.8167	17.6667	Willow	Salix	field trial	2006							0.013	m2 g-1	Observational
Weih and Ronnberg-Wastljung, 2007	Sweden	Ultuna, Uppsala	59.8167	17.6667	Willow	Salix	field trial	2006							0.0146	m2 g-1	Observational
Weih and Ronnberg-Wastljung, 2007	Sweden	Ultuna, Uppsala	59.8167	17.6667	Willow	Salix	field trial	2006							0.0149	m2 g-1	Observational
Weih and Ronnberg-Wastljung, 2007	Sweden	Ultuna, Uppsala	59.8167	17.6667	Willow	Salix	field trial	2006							0.0145	m2 g-1	Observational
Weih and Ronnberg-Wastljung, 2007	Sweden	Ultuna, Uppsala	59.8167	17.6667	Willow	Salix	field trial	2006							0.015	m2 g-1	Observational
Weih and Ronnberg-Wastljung, 2007	Sweden	Ultuna, Uppsala	59.8167	17.6667	Willow	Salix	field trial	2006							0.0173	m2 g-1	Observational
Weih and Ronnberg-Wastljung, 2007	Sweden	Ultuna, Uppsala	59.8167	17.6667	Willow	Salix	field trial	2006							0.0162	m2 g-1	Observational
Weih and Ronnberg-Wastljung, 2007	Sweden	Ultuna, Uppsala	59.8167	17.6667	Willow	Salix	field trial	2006							0.0175	m2 g-1	Observational
Weih and Ronnberg-Wastljung, 2007	Sweden	Ultuna, Uppsala	59.8167	17.6667	Willow	Salix	field trial	2006							0.0183	m2 g-1	Observational
Weih and Ronnberg-Wastljung, 2007	Sweden	Ultuna, Uppsala	59.8167	17.6667	Willow	Salix	field trial	2006							0.0176	m2 g-1	Observational
Weih and Ronnberg-Wastljung, 2007	Sweden	Ultuna, Uppsala	59.8167	17.6667	Willow	Salix	field trial	2006							0.0188	m2 g-1	Observational
Weih and Ronnberg-Wastljung, 2007	Sweden	Ultuna, Uppsala	59.8167	17.6667	Willow	Salix	field trial	2006							0.0196	m2 g-1	Observational
Weih and Ronnberg-Wastljung, 2007	Sweden	Ultuna, Uppsala	59.8167	17.6667	Willow	Salix	field trial	2006							0.0197	m2 g-1	Observational
Weih and Ronnberg-Wastljung, 2007	Sweden	Ultuna, Uppsala	59.8167	17.6667	Willow	Salix	field trial	2006							0.0198	m2 g-1	Observational
Weih and Ronnberg-Wastljung, 2007	Sweden	Ultuna, Uppsala	59.8167	17.6667	Willow	Salix	field trial	2006							0.0205	m2 g-1	Observational
Weih and Ronnberg-Wastljung, 2007	Sweden	Ultuna, Uppsala	59.8167	17.6667	Willow	Salix	field trial	2006							0.0201	m2 g-1	Observational
Weih and Ronnberg-Wastljung, 2007	Sweden	Ultuna, Uppsala	59.8167	17.6667	Willow	Salix	field trial	2006							0.0207	m2 g-1	Observational
Weih and Ronnberg-Wastljung, 2007	Sweden	Ultuna, Uppsala	59.8167	17.6667	Willow	Salix	field trial	2006							0.0217	m2 g-1	Observational
Weih and Ronnberg-Wastljung, 2007	Sweden	Ultuna, Uppsala	59.8167	17.6667	Willow	Salix	field trial	2006							0.0217	m2 g-1	Observational
Weih and Ronnberg-Wastljung, 2007	Sweden	Ultuna, Uppsala	59.8167	17.6667	Willow	Salix	field trial	2006							0.0223	m2 g-1	Observational
Weih and Ronnberg-Wastljung, 2007	Sweden	Ultuna, Uppsala	59.8167	17.6667	Willow	Salix	field trial	2006							0.0234	m2 g-1	Observational
Weih and Ronnberg-Wastljung, 2007	Sweden	Ultuna, Uppsala	59.8167	17.6667	Willow	Salix	field trial	2006							0.0229	m2 g-1	Observational
Weih and Ronnberg-Wastljung, 2007	Sweden	Ultuna, Uppsala	59.8167	17.6667	Willow	Salix	field trial	2006							0.0224	m2 g-1	Observational
Weih and Ronnberg-Wastljung, 2007	Sweden	Ultuna, Uppsala	59.8167	17.6667	Willow	Salix	field trial	2006							0.0229	m2 g-1	Observational
Weih and Ronnberg-Wastljung, 2007	Sweden	Ultuna, Uppsala	59.8167	17.6667	Willow	Salix	field trial	2006							0.0262	m2 g-1	Observational
Weih and Ronnberg-Wastljung, 2007	Sweden	Ultuna, Uppsala	59.8167	17.6667	Willow	Salix	field trial	2006							0.0264	m2 g-1	Observational
Weih and Ronnberg-Wastljung, 2007	Sweden	Ultuna, Uppsala	59.8167	17.6667	Willow	Salix	field trial	2006							0.0253	m2 g-1	Observational
Weih and Ronnberg-Wastljung, 2007	Sweden	Ultuna, Uppsala	59.8167	17.6667	Willow	Salix	field trial								0.0218	m2 g-1	Observational
Marron et al., 2007, EEB	France	Loire Valley, Orleans	47.7667	1.86667	Poplar	Populus	field experiment	2005-06-01							0.0183	m2 g-1	Observational
Marron et al., 2007, EEB	Italy	Cavallermaggiore, Po valley	44.7	7.66667	Poplar	Populus	field experiment	2005-06-01							0.0163	m2 g-1	Observational
Marron et al., 2007, EEB	France	Loire Valley, Orleans	47.7667	1.86667	Poplar	Populus	field experiment	2005-06-01							0.017	m2 g-1	Observational
Marron et al., 2007, EEB	Italy	Cavallermaggiore, Po valley	44.7	7.66667	Poplar	Populus	field experiment	2005-06-01							0.0145	m2 g-1	Observational
Knapp, 1985, Ecology	USA	Konza	39.01	-96.58	Switchgrass	Panicum virgatum	field measurement	Week of Jun 2, 1983							0.0195	m2 g-1	unburned
Knapp, 1985, Ecology	USA	Konza	39.01	-96.58	Switchgrass	Panicum virgatum	field measurement	Week of Jun 2, 1983							0.0186	m2 g-1	burned
Dohleman et al., 2009, PCE	USA	University of Illinois Urbana-Champaign	40.05	-88.2	Miscanthus	Miscanthus x giganteus	field trial					25	79.32	umol/m2/s	0.0153	m2 g-1	observational
Dohleman et al., 2009, PCE	USA	University of Illinois Urbana-Champaign	40.05	-88.2	Switchgrass	Panicum virgatum Cave-In-Rock	field trial					25	66.81	umol/m2/s	0.0117	m2 g-1	observational
Whitehead and Beadle, 2004, FEM					Eucalyptus	E. obliqua	review								0.0044	m2 g-1	native forest
Whitehead and Beadle, 2004, FEM					Eucalyptus	E. viminalis	review								0.0067	m2 g-1	native forest
Whitehead and Beadle, 2004, FEM					Eucalyptus	E. behriana	review								0.0036	m2 g-1	native forest
Whitehead and Beadle, 2004, FEM					Eucalyptus	E. incressata	review								0.0022	m2 g-1	native forest
Whitehead and Beadle, 2004, FEM					Eucalyptus	E. maculata	review								0.0083	m2 g-1	native forest
Whitehead and Beadle, 2004, FEM					Eucalyptus	E. pilularis	review								0.0078	m2 g-1	native forest
Whitehead and Beadle, 2004, FEM					Eucalyptus	E. melliodora	review								0.0056	m2 g-1	native forest
Whitehead and Beadle, 2004, FEM					Eucalyptus	E. pauciflora	review								0.0031	m2 g-1	native forest
Whitehead and Beadle, 2004, FEM					Eucalyptus	E. nitens	review								0.00465	m2 g-1	plantation species
Whitehead and Beadle, 2004, FEM					Eucalyptus	E. globulus	review								0.006	m2 g-1	plantation species
Whitehead and Beadle, 2004, FEM					Eucalyptus	E. grandis	review								0.026	m2 g-1	controlled environment species
Whitehead and Beadle, 2004, FEM					Eucalyptus	E. macrorhyncha	review								0.0134	m2 g-1	controlled environment species
Whitehead and Beadle, 2004, FEM					Eucalyptus	E. goniocalys	review								0.0183	m2 g-1	controlled environment species

## Sheet: TableS1_reference list
References in Table S1
Albaugh, J. M., Domec, J. C., Maier, C. A., Sucre, E. B., Leggett, Z. H. and King, J. S.: Gas exchange and stand-level estimates of water use and gross primary productivity in an experimental pine and switchgrass intercrop forestry system on the Lower Coastal Plain of North Carolina, U.S.A, Agric. For. Meteorol., 192–193, 27–40, doi:10.1016/j.agrformet.2014.02.013, 2014.
Bernacchi, C. J., Calfapietra, C., Davey, P. A., Wittig, V. E., Scarascia-Mugnozza, G. E., Raines, C. A. and Long, S. P.: Photosynthesis and stomatal conductance responses of poplars to free-air CO2 enrichment (PopFACE) during the first growth cycle and immediately following coppice, New Phytol., 159(3), 609–621, doi:10.1046/j.1469-8137.2003.00850.x, 2003.
Byrd, G. T. and May, P. A.: Physiological comparisons of switchgrass cultivars differing in transpiration efficiency, Crop Sci., 40(5), 1271–1277, doi:10.2135/cropsci2000.4051271x, 2000.
Dohleman, F. G., Heaton, E. A., Leakey, A. D. B. and Long, S. P.: Does greater leaf‐level photosynthesis explain the larger solar energy conversion efficiency of Miscanthus relative to switchgrass?, Plant. Cell Environ., 32(11), 1525–1537, 2009.
Dowell, R. C., Gibbins, D., Rhoads, J. L. and Pallardy, S. G.: Biomass production physiology and soil carbon dynamics in short-rotation-grown Populus deltoides and P. deltoides × P. nigra hybrids, Forest Ecol. Manag., 257(1), 134–142, doi:10.1016/j.foreco.2008.08.023, 2009.
Gaudillere, J. P. and Mousseau, M.: Short term effect of CO2 enrichment on leaf development and gas exchange of young poplars (Populus euramericana cv. I 214), Acta Oecologica, Oecologia Plant., 10(1), 95–105, 1989.
Grassi, G., Meir, P., Cromer, R., Tompkins, D. and Jarvis, P. G.: Photosynthetic parameters in seedlings of Eucalyptus grandis as affected by rate of nitrogen supply, Plant, Cell Environ., 25(12), 1677–1688, doi:10.1046/j.1365-3040.2002.00946.x, 2002.
Guo, J. and Trotter, C. M.: Estimating photosynthetic light-use efficiency using the photochemical reflectance index: Variations among species, Funct. Plant Biol., 31(3), 255–265, doi:10.1071/FP03185, 2004.
Jurik, T. W., Weber, J. a and Gates, D. M.: Short-Term Effects of CO(2) on Gas Exchange of Leaves of Bigtooth Aspen (Populus grandidentata) in the Field., Plant Physiol., 75(4), 1022–6 [online] Available from: http://www.pubmedcentral.nih.gov/articlerender.fcgi?artid=1067045&tool=pmcentrez&rendertype=abstract, 1984.
Kirschbaum, M. U. F.: Water stress in Eucalyptus pauciflora: comparison of effects on stomatal conductance with effects on the mesophyll capacity for photosynthesis, and investigation of a possible involvement of photoinhibition, Planta, 171(4), 466–473, doi:10.1007/BF00392293, 1987.
Kirschbaum, M. U. F.: Recovery of photosynthesis from water stress in Eucalyptus pauciflora — a process in two stages, Plant, Cell Environ., 11, 685–694, doi:10.1111/j.1365-3040.1988.tb01151.x, 1988.
Kirschbaum, M. U. F. and Farquhar, G. D.: Temperature Dependence of Whole-Leaf Photosynthesis in Eucalyptus pauciflora Sieb. Ex Spreng, Funct. Plant Biol., 11(6), 519–538, doi:10.1071/PP9840519, 1984.
Kirschbaum, M. U. F. and Tompkins, D.: Photosynthetic responses to phosphorus nutrition in Eucalyptus grandis seedlings, Australian-Journal-of-Plant-Physiology, 17(5), 527–535, doi:doi:10.1071/PP9900527, 1990.
Knapp, A. K.: Effect of fire and drought on the ecophysiology of Andropogon gerardii and Panicum virgatum in a tallgrass prairie., Ecology, 66(4), 1309–1320, doi:10.2307/1939184, 1985.
Kuppers, M., Swan, A. G., Tompkins, D., Gabriel, W. C. L., Kuppers, B. I. L. and Linder, S.: A field portable system for the measurement of gas exchange of leaves under natural and controlled conditions: examples with field‐grown Eucalyptus pauciflora Sieb. ex Spreng. ssp. pauciflora, E. behriana F. Muell. and Pinus radiata R. Don., Plant. Cell Environ., 10(5), 425–435, doi:10.1111/1365-3040.ep11…
Lin, Y.-S.: How will Eucalyptus tree species respond to global climate change?: a comparison of temperature responses of photosynthesis, 2012.
Lin, Y. S., Medlyn, B. E., De Kauwe, M. G. and Ellsworth, D. S.: Biochemical photosynthetic responses to temperature: How do interspecific differences compare with seasonal shifts?, Tree Physiol., 33(8), 793–806, doi:10.1093/treephys/tpt047, 2013.
Marron, N., Dillen, S. Y. and Ceulemans, R.: Evaluation of leaf traits for indirect selection of high yielding poplar hybrids, Environ. Exp. Bot., 61(2), 103–116, doi:10.1016/j.envexpbot.2007.04.002, 2007.
Merilo, E., Heinsoo, K., Kull, O., Söderbergh, I., Lundmark, T. and Koppel, A.: Leaf photosynthetic properties in a willow (Salix viminalis and salix dasyclados) plantation in response to fertilization, Eur. J. For. Res., 125(2), 93–100, doi:10.1007/s10342-005-0073-7, 2006.
Mitchell, J. L. B.: Cool Temperature Effects on Productivity and Photosynthesis of Two Biomass Fuel Species: Switchgrass (Panicum virgatum) and Miscanthus (Miscanthus x giganteus), Virginia Tech., 2013.
Ögren, E. and Öquist, G.: Effects of drought on photosynthesis, chlorophyll fluorescence and photoinhibition susceptibility in intact willow leaves, Planta, 166(3), 380–388, doi:10.1007/BF00401176, 1985.
Oparah, I. A.: Photosynthetic acclimation to temperature of four Eucalyptus species and Sequoia sempervirens, 2012.
Regehr, D. L., Bazzaz, F. A. and Boggess, W. R.: Photosynthesis, transpiration and leaf conductance of Populus deltoides in relation to flooding and drought, Photosynthetica, 1975.
Sage, R. F. and Sharkey, T. D.: The Effect of temperature on the occurrence of O2 and CO2 insensitive photosynthesis in field grown plants, Plant Physiol., 84(3), 658–664, doi:10.1104/pp.84.3.658, 1987.
Sharkey, T.D., Loreto, F., and Delwiche, C. F.: High carbon dioxide and sun / shade effects on isoprene emission from oak and aspen tree leaves, Plant, Cell Environ., 333–338, doi:10.1111/j.1365-3040.1991.tb01509.x, 1991.
Sharwood, R. E., Crous, K. Y., Whitney, S. M., Ellsworth, D. S. and Ghannoum, O.: Linking photosynthesis and leaf N allocation under future elevated CO2 and climate warming in Eucalyptus globulus, J. Exp. Bot., 68(5), 1157–1167, doi:10.1093/jxb/erw484, 2017.
Trócsányi, Z. K., Fieldsend, A. F. and Wolf, D. D.: Yield and canopy characteristics of switchgrass (Panicum virgatum L.) as influenced by cutting management, Biomass and Bioenergy, 33(3), 442–448, doi:10.1016/j.biombioe.2008.08.014, 2009.
Wang, D., Maughan, M. W., Sun, J., Feng, X., Miguez, F., Lee, D. and Dietze, M. C.: Impact of nitrogen allocation on growth and photosynthesis of Miscanthus (Miscanthus× giganteus), Gcb Bioenergy, 4(6), 688–697, 2012.
Wang, D., Naidu, S. L., Portis, A. R., Moose, S. P. and Long, S. P.: Can the cold tolerance of C4 photosynthesis in Miscanthus x giganteus relative to Zea mays be explained by differences in activities and thermal properties of Rubisco?, in Journal of Experimental Botany, vol. 59, pp. 1779–1787., 2008.
Weih, M. and Rönnberg-Wästjung, A.-C.: Shoot biomass growth is related to the vertical leaf nitrogen gradient in Salix canopies., Tree Physiol., 27(11), 1551–1559, doi:10.1093/treephys/27.11.1551, 2007.
Whitehead, D. and Beadle, C. L.: Physiological regulation of productivity and water use in Eucalyptus: a review, Forest Ecol. Manag., 193(1), 113–140, 2004.
Wullschleger, S. D.: Biochemical limitations to carbon assimilation in C3 plants—a retrospective analysis of the A/Ci curves from 109 species, J. Exp. Bot., 44(5), 907–920, 1993.
Yan, J., Zhu, C., Liu, W., Luo, F., Mi, J., Ren, Y., Li, J. and Sang, T.: High photosynthetic rate and water use efficiency of Miscanthus lutarioriparius characterize an energy crop in the semiarid temperate region, GCB Bioenergy, 7(2), 207–218, doi:10.1111/gcbb.12118, 2015.

## Sheet: Table S2
Table S2 Site information of the biomass-aga curves
PFT	Site number	No. in Dataset	Reference	Country	Lat	Lon	Biomass	Difference between model and observation	Possible reasons for the difference
Eucalypt	1	13	Forrester et al., 2010, FEM2	Australia	-37.6878	143.788	aboveground	Consistent in the first years but underestimate after 6 years	Not sure
Eucalypt	2	14	Forrester et al., 2013, FEM	Australia	-38.3833	146.683	aboveground	Very consistent	Not needed.
Eucalypt	3	15	Gazarini et al., 1990	Portugal	38.0333	-9.25	aboveground	Understimate at Age 3	Irrigation and fertilization in the field.
Eucalypt	4	23	Han et al., 2010	China	21.5	111.633	aboveground+belowground	Overestimate in the first 2 years	Large spacing of plantation in the field.
Eucalypt	5	24	Liu, 2012	China	21.8	108.65	aboveground+belowground	Overestimate at all ages	Not sure.
Eucalypt	6	25	Wen, 2006	China	22.39	107.91	aboveground+belowground	Consistent in the first years but underestimate after 4 years	Not sure.
Eucalypt	7	26	Xiang, 2012	China	19.38	110.1	aboveground	Very consistent	Not needed.
Eucalypt	8	27	Xiang, 2012	China	19.91	109.71	aboveground	Generally consistent	Not needed.
Eucalypt	9	28	Xiang, 2012	China	19.7	109.36	aboveground	Generally consistent	Not needed.
Eucalypt	10	29	Xiang, 2012	China	19.23	110.43	aboveground	Very consistent	Not needed.
Eucalypt	11	30	Zhou et al., 2010, CJAE	China	21.25	109.983	aboveground+belowground	Generally consistent	Not needed.
Eucalypt	12	31	Zhou et al., 2013, JTSB	China	21.25	109.983	aboveground+belowground	Generally consistent	Not needed.
Eucalypt	13	33	Frederick et al., 1985	New Zealand	-38.3333	175.75	aboveground	Uderestimate at all ages, especially after 5 years	Fertilization in the field.
Willow	1	0	Adegbidi et al., 2001	USA	42.7833	-76.1167	aboveground	Underestimate at all ages	Irrigation and heavy fertilization in the field.
Poplar	2	1	Auclair and Bouvarel, 1992	France	47.82	1.91	aboveground	Consistent in the first 3 years but underestimating afterward	Irrigation and fertilization in the field.
Willow	3	2	Kajba and Katièiæ, 2011	Croatia	45.6	18.7	aboveground	Consistent in the first 3 years but underestimating afterward	Field measurements from a range of different clone types.
Willow	4	3	Christersson, 1986	Sweden	56.86	12.58	aboveground	Underestimate	Irrigation and heavy fertilization in the field.
Poplar	5	4	DeBell et al., 1993	USA	47	-122.75	aboveground	Uderestimate at all ages	Heavy fertilization in the field.
Poplar	6	5	Heilman and Peabody Jr., 1981	USA	48.4	-122.4	aboveground	Slightly underestimate	From a range of different spacing and harvest cycles (rotation length) in the field.
Poplar	7	6	Heilman and Peabody Jr., 1981	USA	47.23	-122.23	aboveground	Consistent at age 4 but overestimate at Age 8	Same as above.
Willow	8	7	Lindegaard et al., 2011	UK	51	-2	aboveground	Underestimate	From a range of different willow varieties/genotypes. Lindegaard et al. (2011) also claimed that it is a trail study and can generate higher yields than large-scale commercial plantations because of the differences in land quality and practice guidelines (e.g. cutting, harvest index).
Willow	9	8	Lindegaard et al., 2011	UK	54	-6	aboveground	Underestimate	Same as above.
Willow	10	9	Lindegaard et al., 2011	UK	54	-1	aboveground	Underestimate	Same as above.
Willow	11	10	Lindegaard et al., 2011	UK	52	-4	aboveground	Underestimate	Same as above.
Poplar	12	18	Lodhiyal et al., 1995	India	29.125	79.3583	aboveground	Consistent at age 5 and slightly overestimate afterward	Not needed.
Poplar	13	19	Strong and Hansen, 1993	USA	45.57	-89.66	aboveground	Very consistent	Not needed.
Poplar	14	20	Strong and Hansen, 1993	USA	45.64	-89.47	aboveground	Consistent at age 2 but underestimating afterward	This site only have one single genotype while values at Site #13 and #15 are the average of several genotypes.
Poplar	15	21	Strong and Hansen, 1993	USA	45.57	-89.66	aboveground	Very consistent	Not needed.
Willow	16	22	Verwijst, 1991	Sweden	59.8167	17.6667	aboveground	Underestimate at all ages	Irrigation and fertilization in the field.
Poplar	17	32	Song et al., 2010, JNFU	China	36.8333	116.242	aboveground+belowground	Consistent at age 1 and 4 but underestimate at age 2, 5 and 6	Improved genotype.
Poplar	18	34	Xue et al., 2010, JIMFST	China	42.1	122.567	aboveground	Overestimate	Planted on the poor sandy land.

## Sheet: TableS3
Table S3 Results from the multiple linear regressions of relative model-observation difference against PFT types and climate forcing variables. The r2 of the regression is low (0.01) and non-significant (p = 0.28). The climate variables were standardized before applying the multiple linear regression. The asterisks indicate statistically significant (p < 0.05).
Variable	Name	Unit	Coefficient sign	p value
constant	constant in the regression	-	+	0.002*
PFT	PFT types	-	-	0.91
Tair	air temperature	K	-	0.04*
Rainf	rainfall	kg m-2 s-1	-	0.97
LWdown	long-wave radiation	W m-2	+	0.67
SWdown	short-wave radiation	W m-2	+	0.28
Qair	specific humidity	g g-1	+	0.04*
PSurf	air pressure	Pa	+	0.63
Snowf	snowfall	kg m-2 s-1	+	0.99
Wind_E	wind speed in the direction of east	m s-1	+	0.05*
Wind_N	wind speed in the direction of north	m s-1	-	0.22
